# Supplementary material for: Engineered Microvessel for Cell Culture in Simulated Microgravity
Source: MDPI journal article supplement (doi:10.3390/ijms22126331), 2021-06-13
Supplement: s1 [file s1]

# Engineered Microvessel for Cell Culture in Simulated Microgravity

Mei ElGindi, Ibrahim Hamid Ibrahim, Jiranuwat Sapudom, Anna Garcia-Sabate and Jeremy C. M. Teo \*

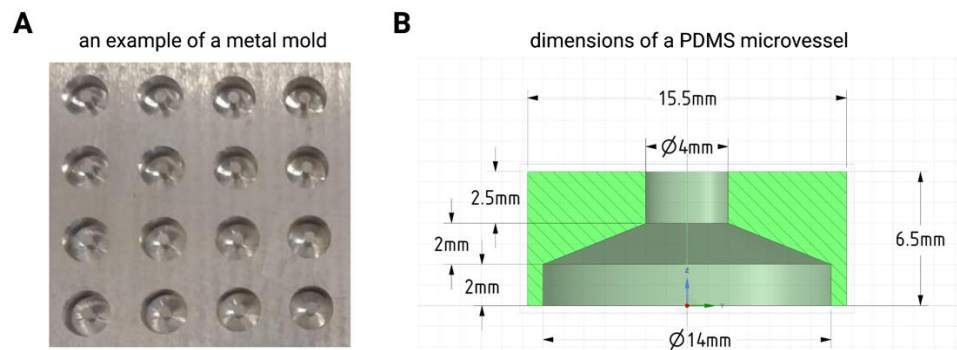

**Figure S1.** Dimensions of metal mold for PDMS microvessel casting. **(A)** Representative image of mold used for casting PDMS microvessels. **(B)** Dimensions of PDMS mold design.
